# Supplementary material
Source: PubMed Central journal article supplement (PMC2907113)
Supplement: NIHMS209406-supplement-1_si_001.pdf [file NIHMS209406-supplement-1_si_001.pdf]

## Supporting Information

Reference 28

Frisch, M. J.; Trucks, G. W.; Schlegel, H. B.; Scuseria, G. E.; Robb, M. A.; Cheeseman, J. R.; J. A. Montgomery, J.; Vreven, T.; Kudin, K. N.; Burant, J. C.; Millam, J. M.; Iyengar, S. S.; Tomasi, J.; Barone, V.; Mennucci, B.; Cossi, M.; Scalmani, G.; Rega, N.; Petersson, G. A.; Nakatsuji, H.; Hada, M.; Ehara, M.; Toyota, K.; Fukuda, R.; Hasegawa, J.; Ishida, M.; Nakajima, T.; Honda, Y.; Kitao, O.; Nakai, H.; Klene, M.; Li, X.; Knox, J. E.; Hratchian, H. P.; Cross, J. B.; Adamo, C.; Jaramillo, J.; Gomperts, R.; Stratmann, R. E.; Yazyev, O.; Austin, A. J.; Cammi, R.; Pomelli, C.; Ochterski, J. W.; Ayala, P. Y.; Morokuma, K.; Voth, G. A.; Salvador, P.; Dannenberg, J. J.; Zakrzewski, V. G.; Dapprich, S.; Daniels, A. D.; Strain, M. C.; Farkas, O.; Malick, D. K.; Rabuck, A. D.; Raghavachari, K.; Foresman, J. B.; Ortiz, J. V.; Cui, Q.; Baboul, A. G.; Clifford, S.; Cioslowski, J.; Stefanov, B. B.; Liu, G.; Liashenko, A.; Piskorz, P.; Komaromi, I.; Martin, R. L.; Fox, D. J.; Keith, T.; Al-Laham, M. A.; Peng, C. Y.; Naayakkara, A.; Challacombe, M.; Gill, P. M. W.; Johnson, B.; Chen, W.; Wong, M. W.; Gonzalez, C.; Pople, J. A., *Gaussian 03, Revisions C.01 and E.01*, Wallingford, CT, 2004.

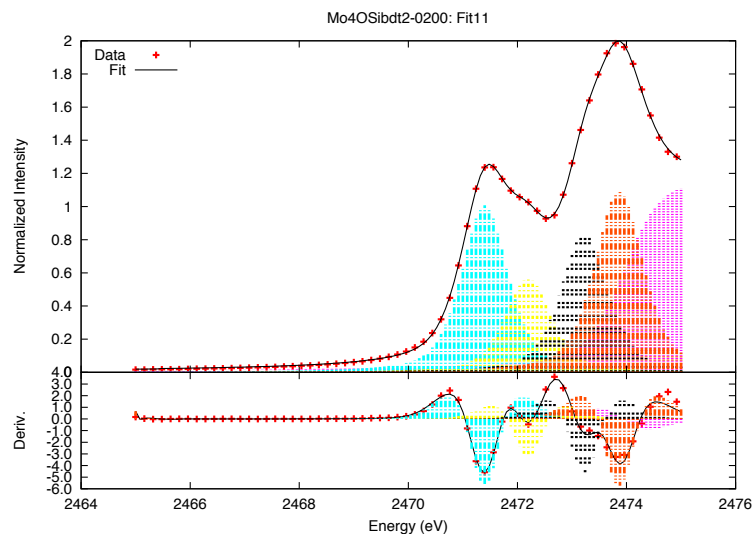

**Figure S1:** Fit to normalized data and second derivative of  $[\text{Mo}(\text{OSi})(\text{bdt})_2]^{1-}$ .

**Table S1:** Parameters for fit of  $[\text{Mo}(\text{OSi})(\text{bdt})_2]^{1-}$ . The first four rows correspond to peaks while the last row corresponds to the rising edge.

| Energy (eV) | Amplitude | Width | Area  |
|-------------|-----------|-------|-------|
| 2471.40     | 1.008     | 0.504 | 1.017 |
| 2472.16     | 0.567     | 0.504 | 0.572 |
| 2473.24     | 0.841     | 0.514 | 0.866 |
| 2473.86     | 1.094     | 0.528 | 1.155 |
| 2473.94     | 1.104     | 0.594 | –     |

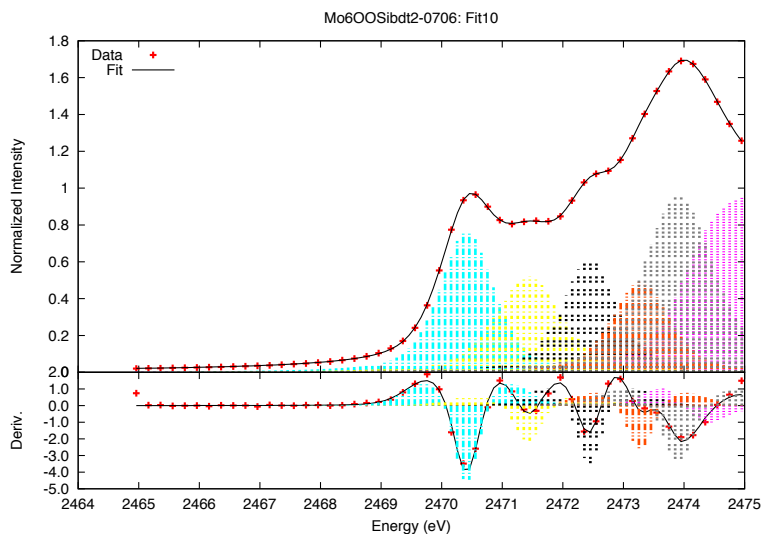

**Figure S2:** Fit to normalized data and second derivative of  $[\text{MoO}(\text{OSi})(\text{bdt})_2]^{1-}$ .

**Table S2:** Parameters for fit of  $[\text{MoO}(\text{OSi})(\text{bdt})_2]^{1-}$ . The first five rows correspond to peaks while the last row corresponds to the rising edge.

| Energy (eV) | Amplitude | Width | Area  |
|-------------|-----------|-------|-------|
| 2470.41     | 0.768     | 0.528 | 0.811 |
| 2471.43     | 0.524     | 0.642 | 0.673 |
| 2472.44     | 0.618     | 0.544 | 0.672 |
| 2473.28     | 0.493     | 0.562 | 0.554 |
| 2473.91     | 0.960     | 0.698 | 1.339 |
| 2474.00     | 1.022     | 0.525 | —     |

**Table S3:** Comparison of structural parameters of the geometry optimized (DFT) and crystallographic structures.

|              | $[\text{Mo}(\text{OSi})(\text{bdt})_2]^{1-}$ |       | $[\text{MoO}(\text{OSi})(\text{bdt})_2]^{1-}$ |       |
|--------------|----------------------------------------------|-------|-----------------------------------------------|-------|
|              | Crystal                                      | DFT   | Crystal                                       | DFT   |
| Mo-S1 (Å)    | 2.34                                         | 2.37  | 2.43                                          | 2.47  |
| Mo-S2 (Å)    | 2.34                                         | 2.37  | 2.41                                          | 2.44  |
| Mo-S3 (Å)    | 2.34                                         | 2.37  | 2.44                                          | 2.46  |
| Mo-S4 (Å)    | 2.34                                         | 2.37  | 2.49                                          | 2.57  |
| Mo-O (Å)     | 1.84                                         | 1.86  | 1.93                                          | 1.94  |
| Mo=O (Å)     | –                                            | –     | 1.71                                          | 1.70  |
| $\theta$ (°) | 143.4                                        | 143.4 | 152.8                                         | 157.5 |
| $\phi$ (°)   | 178.8                                        | 179.8 | 109.2                                         | 106.6 |

**Table S4:** Molecular Orbital Composition (%) Near the HOMO-LUMO Gap<sup>a</sup>

|                                               |                                           | Mo d      | Mo s     | Mo p     | S p       | O(Si)    | O         | C/H       |
|-----------------------------------------------|-------------------------------------------|-----------|----------|----------|-----------|----------|-----------|-----------|
| $[\text{Mo}(\text{mdt})_3]^{2-}$              | <b>Mo <math>d_{xz}/d_{yz}</math></b>      | <b>52</b> | <b>0</b> | <b>0</b> | <b>41</b> | -        | -         | <b>7</b>  |
|                                               | <b>Mo <math>d_{x^2-y^2}/d_{xy}</math></b> | <b>52</b> | <b>0</b> | <b>0</b> | <b>38</b> | -        | -         | <b>8</b>  |
|                                               | L $\pi_{AB}^+$                            | 0         | 0        | 0        | 70        | -        | -         | 30        |
|                                               | Mo $d_{z^2}$                              | 71        | 1        | 0        | 10        | -        | -         | 13        |
| $[\text{Mo}(\text{mdt})_3]$                   | <b>Mo <math>d_{xz}/d_{yz}</math></b>      | <b>53</b> | <b>0</b> | <b>0</b> | <b>40</b> | -        | -         | <b>6</b>  |
|                                               | <b>Mo <math>d_{x^2-y^2}/d_{xy}</math></b> | <b>49</b> | <b>0</b> | <b>1</b> | <b>42</b> | -        | -         | <b>6</b>  |
|                                               | L $\pi_{AB}^+$                            | <b>15</b> | <b>0</b> | <b>0</b> | <b>54</b> | -        | -         | <b>30</b> |
|                                               | Mo $d_{z^2}$                              | 63        | 1        | 0        | 11        | -        | -         | 18        |
| $[\text{Mo}(\text{OSi})(\text{bdt})_2]^{1-}$  | <b>Mo <math>d_{xy}</math></b>             | <b>52</b> | <b>0</b> | <b>0</b> | <b>45</b> | <b>0</b> | -         | <b>2</b>  |
|                                               | <b>Mo <math>d_{z^2}</math></b>            | <b>55</b> | <b>0</b> | <b>8</b> | <b>18</b> | <b>6</b> | -         | <b>11</b> |
|                                               | <b>Mo <math>d_{xz}</math></b>             | <b>62</b> | <b>0</b> | <b>0</b> | <b>26</b> | <b>6</b> | -         | <b>6</b>  |
|                                               | <b>Mo <math>d_{yz}</math></b>             | <b>62</b> | <b>0</b> | <b>0</b> | <b>19</b> | <b>7</b> | -         | <b>11</b> |
|                                               | Mo $d_{x^2-y^2}$                          | 78        | 0        | 0        | 6         | 0        | -         | 11        |
|                                               | L $\pi_{AB}^+$                            | 3         | 0        | 0        | 51        | 2        | -         | 44        |
| $[\text{MoO}(\text{OSi})(\text{bdt})_2]^{1-}$ | <b>Mo <math>d_{z^2}</math></b>            | <b>44</b> | <b>6</b> | <b>4</b> | <b>23</b> | <b>4</b> | <b>13</b> | <b>3</b>  |
|                                               | <b>Mo <math>d_{xy}</math></b>             | <b>47</b> | <b>0</b> | <b>0</b> | <b>35</b> | <b>2</b> | <b>1</b>  | <b>11</b> |
|                                               | <b>Mo <math>d_{xz}</math></b>             | <b>58</b> | <b>0</b> | <b>1</b> | <b>17</b> | <b>1</b> | <b>18</b> | <b>4</b>  |
|                                               | <b>Mo <math>d_{yz}</math></b>             | <b>60</b> | <b>0</b> | <b>1</b> | <b>8</b>  | <b>3</b> | <b>20</b> | <b>6</b>  |
|                                               | <b>Mo <math>d_{x^2-y^2}</math></b>        | <b>49</b> | <b>0</b> | <b>0</b> | <b>32</b> | <b>7</b> | <b>1</b>  | <b>10</b> |
|                                               | L $\pi_{AB}^+$                            | 2         | 0        | 0        | 54        | 2        | 2         | 39        |

<sup>a</sup>Unoccupied orbitals are shown in bold

**Table S5:** Comparison of structural parameters of the geometry optimized (DFT) structures between Mo(IV) and Mo(VI)=O complexes with truncated axial and dithiolene ligands.

|                        | $[\text{Mo}(\text{OSi})(\text{bdt})_2]^{1-}$ | $[\text{Mo}(\text{OMe})(\text{mdt})_2]^{1-}$ | $[\text{MoO}(\text{OSi})(\text{bdt})_2]^{1-}$ | $\text{MoO}(\text{OMe})(\text{mdt})_2]^{1-}$ |
|------------------------|----------------------------------------------|----------------------------------------------|-----------------------------------------------|----------------------------------------------|
| Mo-S1 ( $\text{\AA}$ ) | 2.37                                         | 2.36                                         | 2.47                                          | 2.48                                         |
| Mo-S2 ( $\text{\AA}$ ) | 2.37                                         | 2.36                                         | 2.44                                          | 2.44                                         |
| Mo-S3 ( $\text{\AA}$ ) | 2.37                                         | 2.37                                         | 2.46                                          | 2.44                                         |
| Mo-S4 ( $\text{\AA}$ ) | 2.37                                         | 2.37                                         | 2.57                                          | 2.57                                         |
| Mo-O ( $\text{\AA}$ )  | 1.86                                         | 1.87                                         | 1.94                                          | 1.96                                         |
| Mo=O ( $\text{\AA}$ )  | –                                            | –                                            | 1.70                                          | 1.71                                         |
| $\theta$ ( $^\circ$ )  | 143.4                                        | 144.8                                        | 157.5                                         | 158.8                                        |
| $\phi$ ( $^\circ$ )    | 179.8                                        | 180.0                                        | 106.6                                         | 109.3                                        |

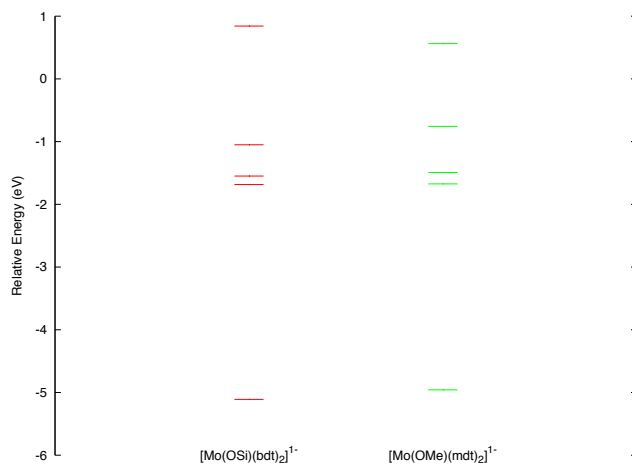

**Figure S3:** Molecular orbital diagram for  $[\text{Mo}(\text{OSi})(\text{bdt})_2]^{1-}$  (left) and  $[\text{Mo}(\text{OMe})(\text{mdt})_2]^{1-}$  (right).

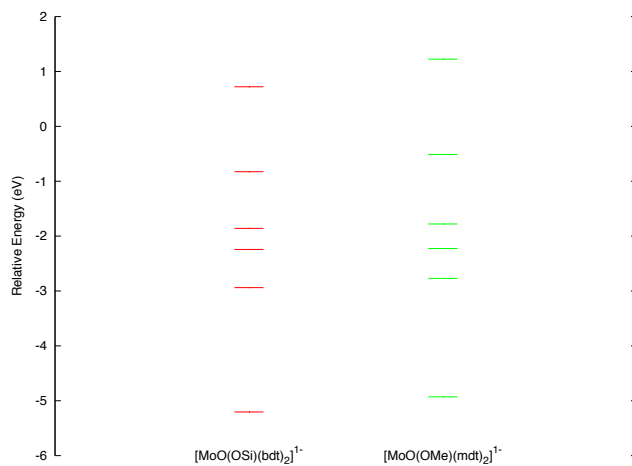

**Figure S4:** Molecular orbital diagram for  $[\text{MoO}(\text{OSi})(\text{bdt})_2]^{1-}$  (left) and  $[\text{MoO}(\text{OMe})(\text{mdt})_2]^{1-}$  (right).

**Table S6:** Molecular Orbital Composition (%) Near the HOMO-LUMO Gap<sup>a</sup>

|                                             |                                                   | Mo d      | Mo s     | Mo p     | S p       | O(Si)    | O         | C/H      |
|---------------------------------------------|---------------------------------------------------|-----------|----------|----------|-----------|----------|-----------|----------|
| [Mo(OMe)(mdt) <sub>2</sub> ] <sup>1-</sup>  | <b>Mo d<sub>xy</sub></b>                          | <b>52</b> | <b>0</b> | <b>0</b> | <b>47</b> | <b>0</b> | -         | <b>2</b> |
|                                             | <b>Mo d<sub>z<sup>2</sup></sub></b>               | <b>55</b> | <b>3</b> | <b>8</b> | <b>19</b> | <b>8</b> | -         | <b>5</b> |
|                                             | <b>Mo d<sub>yz</sub></b>                          | <b>63</b> | <b>0</b> | <b>0</b> | <b>17</b> | <b>9</b> | -         | <b>9</b> |
|                                             | <b>Mo d<sub>xz</sub></b>                          | <b>59</b> | <b>0</b> | <b>1</b> | <b>29</b> | <b>3</b> | -         | <b>6</b> |
|                                             | Mo d <sub>x<sup>2</sup>-y<sup>2</sup></sub>       | 76        | 0        | 0        | 7         | 0        | -         | 12       |
|                                             | L π <sub>AB</sub> <sup>+</sup>                    | 7         | 0        | 0        | 46        | 2        | -         | 44       |
| [MoO(OMe)(mdt) <sub>2</sub> ] <sup>1-</sup> | <b>Mo d<sub>z<sup>2</sup></sub></b>               | <b>46</b> | <b>6</b> | <b>3</b> | <b>20</b> | <b>7</b> | <b>15</b> | <b>3</b> |
|                                             | <b>Mo d<sub>xy</sub></b>                          | <b>49</b> | <b>0</b> | <b>0</b> | <b>38</b> | <b>3</b> | <b>1</b>  | <b>8</b> |
|                                             | <b>Mo d<sub>xz</sub></b>                          | <b>58</b> | <b>0</b> | <b>1</b> | <b>18</b> | <b>1</b> | <b>17</b> | <b>4</b> |
|                                             | <b>Mo d<sub>yz</sub></b>                          | <b>62</b> | <b>0</b> | <b>1</b> | <b>8</b>  | <b>3</b> | <b>21</b> | <b>5</b> |
|                                             | <b>Mo d<sub>x<sup>2</sup>-y<sup>2</sup></sub></b> | <b>47</b> | <b>0</b> | <b>0</b> | <b>34</b> | <b>8</b> | <b>1</b>  | <b>9</b> |
|                                             | L π <sub>AB</sub> <sup>+</sup>                    | 3         | 0        | 0        | 52        | 2        | 3         | 40       |

<sup>a</sup>Unoccupied orbitals are shown in bold
